# Supplementary material for: Epidemiology of Ticks and Tick-Borne Pathogens in Domestic Ruminants across Southern African Development Community (SADC) Region from 1980 until 2021: A Systematic Review and Meta-Analysis
Source: MDPI journal article supplement (doi:10.3390/pathogens11080929), 2022-08-18
Supplement: s1 [file s1]

# Supplementary Materials

## Meta Analysis

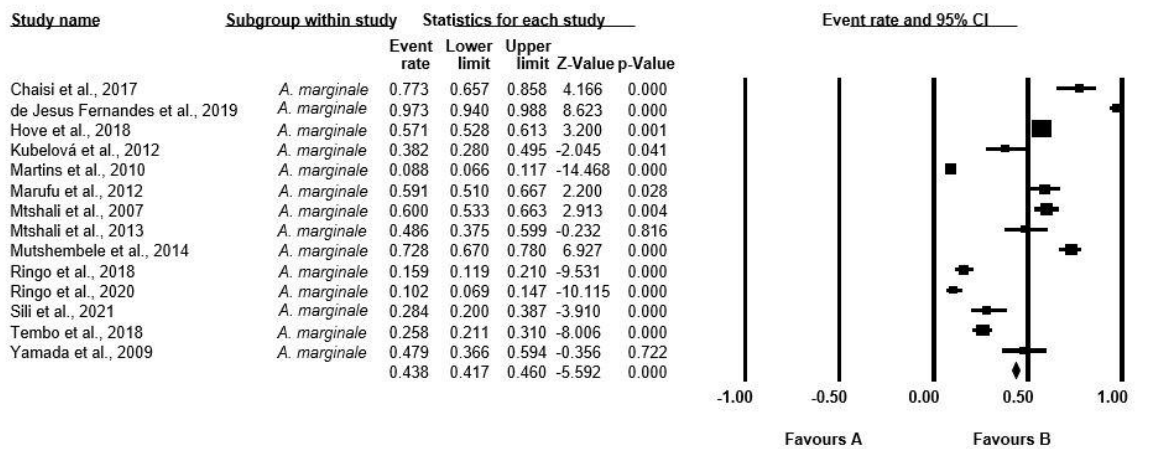

### Meta Analysis

**Figure S1:** Forest plot showing the pooled estimates of *Anaplasma marginale* in South Africa. The squares demonstrate the individual point estimate. The diamond at the base indicates the pooled estimates from the overall studies

## Meta Analysis

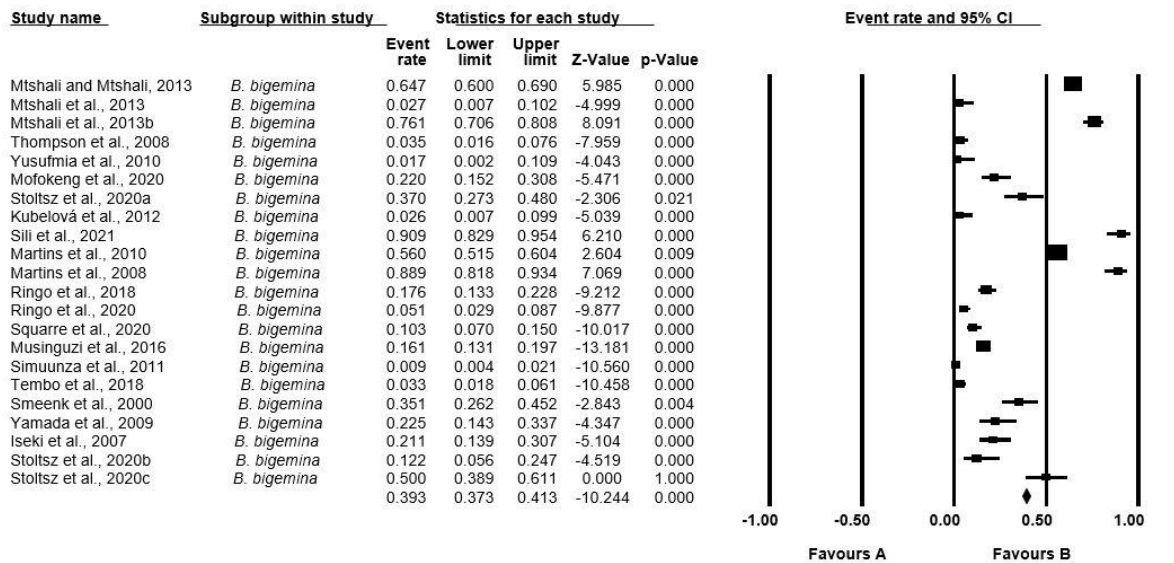

### Meta Analysis

**Figure S2:** Forest plot showing the prevalence of *Babesia bigemina* in South Africa. The squares demonstrate the individual point estimate. The diamond at the base indicates the pooled estimates from the overall studies

## Meta Analysis

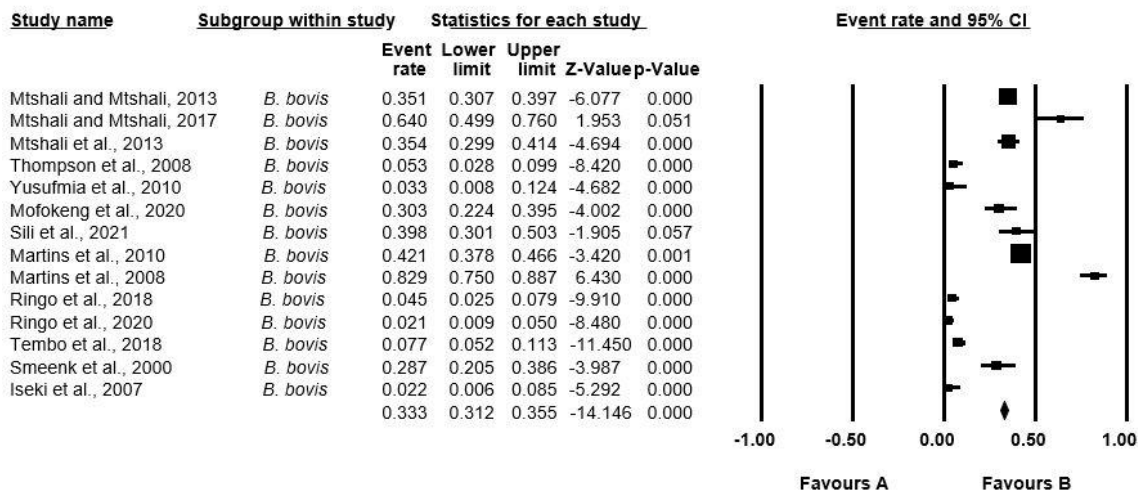

### Meta Analysis

**Figure S3:** Forest plot showing the pooled estimates of *Babesia bovis* in South Africa. The squares demonstrate the individual point estimate. The diamond at the base indicates the pooled estimates from the overall studies

## Meta Analysis

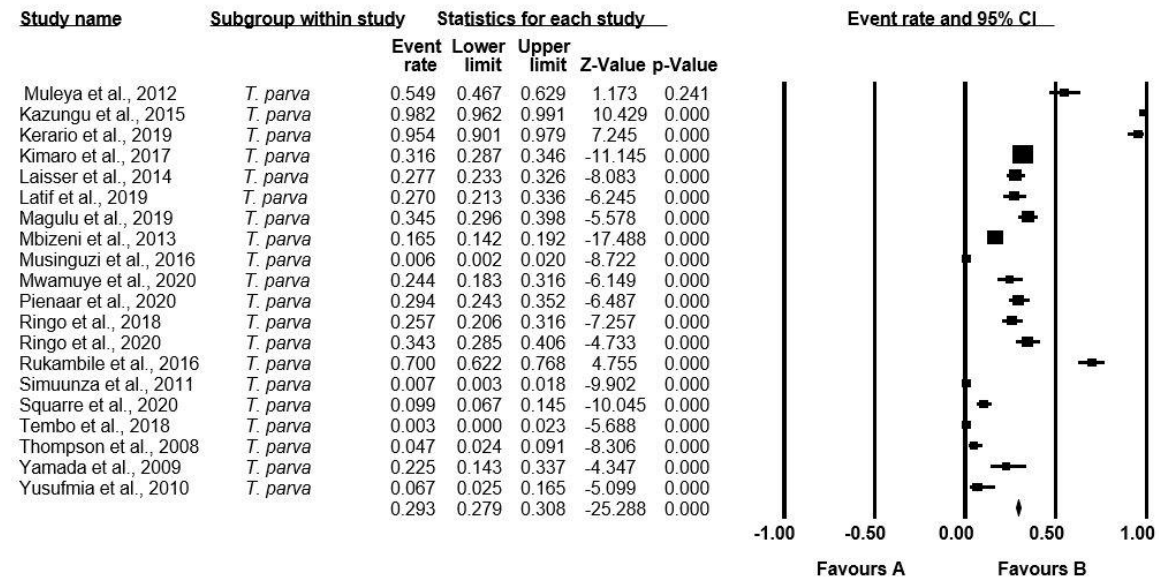

### Meta Analysis

**Figure S4:** Forest plot showing the prevalence of *Theileria Parva* in South Africa. The squares demonstrate the individual point estimate. The diamond at the base indicates the pooled estimates from the overall studies
